*Landscape functional connectivity for butterflies under different scenarios of land-use,  
land-cover, and climate change in Australia*

Vishesh L. Diengdoh<sup>1</sup>, e: [vishesh.diengdoh@utas.edu.au](mailto:vishesh.diengdoh@utas.edu.au), ORCID: <https://orcid.org/0000-0002-0797-9261>

Stefania Ondei<sup>1</sup> - e: [stefania.ondei@utas.edu.au](mailto:stefania.ondei@utas.edu.au)

Rahil J. Amin<sup>1</sup> - e: [RahilJasminkumar.Amin@utas.edu.au](mailto:RahilJasminkumar.Amin@utas.edu.au)

Mark Hunt<sup>1,3</sup> - e: [M.Hunt@utas.edu.au](mailto:M.Hunt@utas.edu.au)

Barry W. Brook<sup>1,2</sup> - e: [barry.brook@utas.edu.au](mailto:barry.brook@utas.edu.au)

<sup>1</sup>School of Natural Sciences, University of Tasmania, Private Bag 55, Hobart TAS 7005  
Australia

<sup>2</sup>ARC Centre of Excellence for Australian Biodiversity and Heritage, Australia

<sup>3</sup>ARC Industrial Transformation Training Centre for Forest Value, Australia

Corresponding Author: Vishesh L. Diengdoh

**Authors contribution**

Conceptualisation: VLD; Methodology: VLD, BWB, SO, RJA; Analysis: VLD, RJA;

Writing (original draft): VLD; Writing (review) VLD, BWB, SO, RJA, MH; Supervision:

BWB, SO, MH; Funding: BWB.

**Declaration of competing interest**

None.

**Acknowledgements**

This work was supported by the Australian Research Council [grant number FL160100101].

## **Research Data**

The habitat suitability maps and functional connectivity maps are made available as GeoTiff images via Figshare (10.6084/m9.figshare.19130078).

1 **Abstract**

2 Pollinating invertebrates are vital to terrestrial ecosystems but are impacted by anthropogenic  
3 habitat loss/fragmentation and climate change. Conserving and improving landscape  
4 connectivity is important to offset those threats, yet its assessment for invertebrates is  
5 lacking. In this study, we evaluated the functional connectivity between protected areas in  
6 Australia for 59 butterfly species, under present conditions and different future scenarios (for  
7 2050 and 2090) of land-use, land-cover, and climate change. Using circuit-theory analysis,  
8 we found that functional connectivity under present conditions varies widely between  
9 species, even when their estimated geographical ranges are similar. Under future scenarios,  
10 functional connectivity is predicted to decrease overall, with negative changes worsening  
11 from 2050 to 2090, although a few species are positive exceptions. We have made our results  
12 available as spatial datasets to allow comparisons with taxa from other studies and can be  
13 used to identify priority areas for conservation in terms of establishing ecological corridors or  
14 stepping-stone habitat patches. Our study highlights the importance of considering pollinating  
15 invertebrates when seeking holistic conservation and restoration of a landscape's functional  
16 connectivity, underscoring the need to expand and promote protected areas to facilitate  
17 functional connectivity under future scenarios of global change.

18 **Keywords**

19 Circuit theory, ecological corridors, habitat suitable models, Lepidoptera

## 20 **1. Introduction**

21 Landscape connectivity is defined as the extent to which the landscape facilitates the  
22 movement of organisms between habitat patches. It can be structural or functional; the former  
23 is dependent on only the landscape structure, while the latter (which is of focus in this study)  
24 also considers species attributes such as habitat preference and dispersal ability (Rudnick et  
25 al. 2012; Costanza and Terando 2019). Habitat loss and fragmentation increase barriers  
26 between suitable habitats reducing gene flow and the ability of a species to track climate  
27 change. Maintaining and restoring landscape connectivity is considered as an important  
28 adaptation strategy to reduce the impact of habitat loss and fragmentation and climate change  
29 and thereby better conserve biodiversity (Rudnick et al. 2012; Costanza and Terando 2019;  
30 Littlefield et al. 2019).

31 Studies on habitat connectivity (i.e., the degree of functional connectivity between patches of  
32 preferred or obligate habitat for individual species) are typically biased towards mammals  
33 and birds (Correa Ayram et al. 2016; Dickson et al. 2019). This leaves a gap in the literature  
34 for invertebrates—particularly pollinating invertebrates—although there are exceptions (e.g.  
35 Filz et al. 2013; Chen 2017; Kirk et al. 2018; Miranda et al. 2021). This gap needs to be  
36 filled, as habitat connectivity is important for sustaining pollinator abundance, diversity, and  
37 dispersal (Potts et al. 2016). Indeed preserving habitat connectivity is an important strategy  
38 for conserving insects (Samways et al. 2020) and its loss can have a negative impact on  
39 pollination (Mitchell et al. 2013).

40 Butterflies make for an ideal functional-connectivity case study because they are a major  
41 pollinating taxon thought to be able to transfer pollen over larger distances than other insects  
42 (Winfree et al. 2011) and are demonstrably impacted by habitat loss/fragmentation and  
43 climate change (Miao et al. 2020; Warren et al. 2021). In some regions, available protected

44 areas are inadequate for butterfly conservation (Chowdhury et al. 2021a) while in other cases,  
45 the effectiveness of protected areas for butterflies is predicted to decrease under climate  
46 change (Cheng and Bonebrake 2017). Expanding and improving the connectivity of protected  
47 areas is part of the Aichi Biodiversity Targets (Target 11; Convention on Biological Diversity  
48 2022). Thus, maintaining and promoting ecological corridors or stepping-stone habitats is  
49 critical to facilitate species movement between metapopulations to prevent inbreeding and  
50 promote recolonisation after extirpation events (Sands 2018), as well as to facilitate  
51 movement in response to climate change (Stewart et al. 2019; Malakoutikhah et al. 2020).

52 The aim of this study is to assess the landscape-scale functional connectivity for butterflies  
53 between protected areas in Australia, under both present conditions and different future  
54 scenarios of land-use, land-cover and climate change (for 2050 and 2090). We assessed the  
55 connectivity for 59 species of butterflies using the *Circuitscape* Julia package (Anantharaman  
56 et al. 2020) which is based on circuit theory (McRae et al. 2008). *Circuitscape* uses circuit  
57 theory to predict patterns of movement or dispersal of organisms or genes (McRae et al.  
58 2008) and has been used for studying landscape population genetics and identifying animal  
59 movement corridors (Dickson et al. 2019). Circuit theory operates on a continuous layer and  
60 considers multiple pathways for movements, making it more flexible than other, simpler  
61 methods like the least-cost pathway (McRae et al. 2008). We then considered the  
62 conservation implications of our findings for habitat prioritisation.

63

## 64 **2. Materials and Methods**

### 65 *2.1 Butterfly species*

66 Occurrence (presence) data were from the Atlas of Living Australia occurrence downloaded  
67 at <https://doi.org/10.26197/ala.9028e7dc-2566-44de-8999-dbb36c6685a9> Accessed 15  
68 February 2021. Records were limited to those from 1960 onwards and classified as ‘human  
69 observation’. Duplicate records based on latitude and longitude were removed. We used  
70 spatial thinning to reduce spatial autocorrelation by removing records closer than a minimum  
71 nearest neighbour distance (NMD) using the R package *spThin* (Aiello-Lammens et al. 2015).  
72 We followed the method by Amin et al. (2021) to find the optimal NMD for each species  
73 separately – adjusting it based on the human activity index. To achieve this, firstly, we  
74 stratified Australia into low, medium and high human activity grids of resolution 25 km<sup>2</sup>  
75 using Global Human-Footprint data (Venter et al. 2018). Secondly, we removed all records  
76 (i.e., of all species combined) closer than 1.25 km to ensure that data in low-density grids  
77 were relatively uncorrelated. Then, for each species, we estimate the threshold number of re-  
78 samples to be retained per grid ( $h$ ) using:  $h = n_i / N_i$  where  $n_i$  represents the number of samples  
79 in low-activity grids and  $N_i$  is the number of low-activity grids. The threshold values were  
80 then applied to calculate the maximum number of re-samples to be retained from medium and  
81 high-density grids, using the formula:  $n_{jk} = h \times N_{jk}$ , where  $n$  is the maximum number of re-  
82 samples from medium  $j$  or high  $k$  density grids, and  $N$  is the number of medium  $j$  or high  
83 grids  $k$ . This was repeated 20 times per sampling run and tuned the NMD for high- and  
84 medium-activity grids to achieve the maximum number of re-samples ( $n_{jk}$ ) for each species.

85 To enable robust model training and validation, we selected only species with at least 100  
86 unique occurrence records (after removing duplicates and accounting for spatial  
87 autocorrelation) for high model performance and estimation of geographical ranges. An  
88 exception to this rule was made for the Ptunarra Brown Butterfly (*Oreixencia ptunarra*  
89 Couchman 1953) which had 96 records as it is a threatened species (Geyle et al. 2021). We  
90 pooled all subspecies into their respective species as this enabled each species to have an

91 adequate number of occurrence records. Consequently, we modelled 59 species in this study,  
92 belonging to the Nymphalidae, Lycaenidae, Hesperidae, Papilionidae families (Supplemental  
93 Table A1).

## 94 *2.2 Habitat suitability models*

95 In this study, we used habitat-suitability maps as the ‘resistance layer’ which represents the  
96 degree to which the landscape facilitates or blocks the movement of an individual across a  
97 given cell. Here, high suitability indicates low resistance (and therefore, a high probability of  
98 movement). Habitat suitability models are commonly used to estimate resistance in  
99 connectivity models (Correa Ayram et al. 2016), and this approach has the advantage of also  
100 providing an opportunity to assess the potential impact of climate change on functional  
101 connectivity (Ashrafzadeh et al. 2019; Bonnin et al. 2020; Malakoutikhah et al. 2020).

102 To model habitat suitability, we selected all 19 bioclimatic variables (version 2.1;  
103 <https://www.worldclim.org>; Fick and Hijmans 2017), elevation (<https://www.worldclim.org>),  
104 and land-use and land-cover change (LULCC; Li et al. 2017) as predictors. The LULCC  
105 variable was resampled to match the resolution of the bioclimatic and elevation variables  
106 (0.05°, or ~5 km at Australian latitudes) using the *raster* R package (Hijmans 2020). We then  
107 reduced the number of predictors by removing highly correlated predictors using a threshold  
108 value of 0.7 (Dormann et al. 2013) and implemented using the *findCorrelation* function in  
109 *caret* R package (Kuhn 2021). If two variables were highly correlated, then the variable with  
110 the largest mean absolute correlation was removed. All non-correlated predictors were used  
111 for model fitting for each species (Supplementary Table A1).

112 The study area for each species was constrained using its estimated kernel geographical  
113 range, which was implemented using the *adehabitatHR* R package (Calenge 2006). We  
114 assumed that a species can disperse within the entirety of its geographical range.

115 Pseudo-absences were generated using a random sampling method, with the presence to  
116 pseudo-absence ratio set to unity. We used k-fold cross-validation ( $k=10$ ) for algorithm  
117 optimisation and implemented using the *caret* R package (Kuhn 2021). The algorithms used  
118 in the study include random forest, artificial neural network, k-nearest neighbour, flexible  
119 discriminant analysis, and naïve Bayes, as they have different operating mechanisms and so  
120 capture a diversity of machine-learning approaches.

121 Random forest is decisions trees based on bagging (Breiman 2001). Artificial neural network  
122 consists of a network of neurons that are considered as the processing units in a strictly feed-  
123 forward neural network (Sazli 2006). k-nearest neighbour works under the assumption that  
124 similar things exist in proximity (in parameter hyperspace) and thus classifies data most  
125 common among its neighbours (Cover and Hart 1967). Flexible discriminant analysis uses  
126 multivariate adaptive regression splines to separate the data (Hastie et al. 1994), while naïve  
127 Bayes is based on conditional probability (Ren et al. 2009).

128 Habitat-suitability models were fitted using the trained algorithms, and then ensembled. An  
129 ensemble algorithm averages the prediction of structurally different algorithms and has the  
130 potential to overcome uncertainty in model selection and improve prediction accuracy by  
131 reducing variance and bias (Dormann et al. 2018). As such, we averaged the algorithms using  
132 an unweighted method and assessed the goodness of fit using AUC and TSS (Allouche et al.  
133 2006).

134 To account for the influence of global climate models (GCMs) we selected CanESM5 and  
135 MIROC6, which have been used in previous studies in Australia (e.g., Briscoe et al. 2016;  
136 Ofori et al. 2017; Morán-Ordóñez et al. 2018) under Shared Socio-economic Pathways  
137 (SSP) 7.0, a high-emission scenario (IPCC 2021). For the LULCC variable, we selected A1  
138 (low population growth, sprawling urban expansion, very high economic growth, rapid



139 technological innovation, strong biofuels demand including cellulose-based ethanol) and B1  
140 (low population growth, compact urban expansion, high economic growth, medium  
141 technological innovation, low overall energy use, lower demand for biofuels) scenarios which  
142 are both oriented globally (Li et al. 2017). Future predictions were made for each species per  
143 algorithm per year per climate model per LULCC scenario, and then ensembled (unweighted)  
144 per year (2050 and 2090).

### 145 *2.3 Functional connectivity models*

146 Functional connectivity was assessed using the *Circuitscape* package in the Julia  
147 Programming Language (Anantharaman et al. 2020). *Circuitscape* calculates connectivity  
148 between focal nodes (habitat patches or populations) across a resistance layer (represents the  
149 degree to which the landscape impedes the movement of an individual across a given cell)  
150 and in analogy to an integrated circuit board in electronics, then calculates the effective  
151 resistance and ‘current flow’ which in the ecological interpretation is a measure of net  
152 movement probability (McRae et al. 2008). The modelling of functional connectivity results  
153 in maps with cumulative current, where the intensity of current is a proxy for a species’  
154 movement at each pixel (Grafius et al. 2017).

155 In this study, we used the centroids of protected areas as focal nodes (Mukherjee et al. 2021);  
156 for this purpose, we only selected protected areas with an average habitat suitability of  $\geq 0.7$   
157 as this represented a high threshold of suitability. We identified focal nodes for each species  
158 individually, under present climate conditions and future climate-change scenarios (for 2050  
159 and 2090).

160 The resistance layer in our study of butterflies is equal to the sum of the habitat suitability  
161 model and Global Human Footprint data (Venter et al. 2018). The Global Human Footprint is  
162 a measure of human impact (Venter et al. 2018), where cells with high impact are associated

163 with high resistance, likely to be a function of dispersal limitation rather than habitat  
164 suitability, as urban and agricultural areas can reduce the ability of butterflies to move across  
165 landscapes and infrastructure such as roads results in significant mortality of butterflies  
166 (Chowdhury et al. 2021b). The predicted habitat-suitability data ranges from 0.0 to 1.0 (low  
167 to high resistance), while the Global Human Footprint data ranges from 0.0 to 100.0 (high to  
168 low). To match the scale and direction of these two data sets, we transformed the habitat  
169 suitability data by subtracting the data from 1 and multiplying it by 100. The transformed  
170 habitat suitability data was added to the Global Human Footprint data and then rounded up to  
171 the nearest integer, because *Circuitscape* does not accept non-integer values. Due to the  
172 unavailability of future Global Human Footprint data, we were forced to assume that this data  
173 is constant under present conditions and future scenarios. The final resistance layer scales  
174 from 0 to 200 (lowest to highest possible resistance). Resistance layers were created for each  
175 species under present climate conditions and future climate scenarios (for 2050 and 2090).

176 We predicted the functional connectivity for each species under present conditions and then  
177 calculated their goodness of fit (AUC) to assess model accuracy (Jackson et al. 2016). We  
178 also calculated the mean cumulative current (with standard error) of the connectivity models.  
179 If a pixel facilitates connectivity, then the presence points should on average have higher  
180 values than pseudo-absences (Grafius et al. 2017; Rodrigues et al. 2021). We then predicted  
181 the functional connectivity for each species under future scenarios (for 2050 and 2090). And  
182 assessed the difference in functional connectivity between present conditions and future  
183 scenarios (i.e., future minus present functional connectivity model) as well.

184

### 185 **3. Results**

186 The habitat suitability models for all 59 Australian butterfly species with sufficient data  
187 achieved high goodness of fit for both AUC and TSS scores. The highest and lowest AUC  
188 scores were 0.99 and 0.94 respectively, while the highest and lowest TSS scores were 0.92  
189 and 0.65 respectively (Supplemental Table A1). The connectivity models also achieved high-  
190 to-moderate goodness of fit, with AUC scores ranging between 0.94 and 0.68  
191 (Supplementary Table A1). The mean cumulative current of the presence points was higher  
192 than that of the pseudo-absences for functional connectivity models of all species  
193 (Supplementary Fig. A1-2).

194 The circuit-theory results (a proxy for functional connectivity) of all the families except for  
195 Papilionidae predicted similar future trends, with mean cumulative current expected to  
196 decrease through to 2090 (Fig. 1). However, the results for individual species provided a  
197 more nuanced perspective than looking at families and exhibited considerably more variation.  
198 For example, *Dispar compacta* (Hesperiidae) has a higher mean cumulative current than  
199 *Hypolycaena phorbas* (Lycaenidae) with current predicted to decrease for the former and  
200 increase for the latter (Fig. 2b, d), whereas for *Acraea andromacha* (Nymphalidae) and  
201 *Graphium choredon* (Papilionidae), future scenarios show similar results to present-day  
202 conditions (Fig. 2a, c).

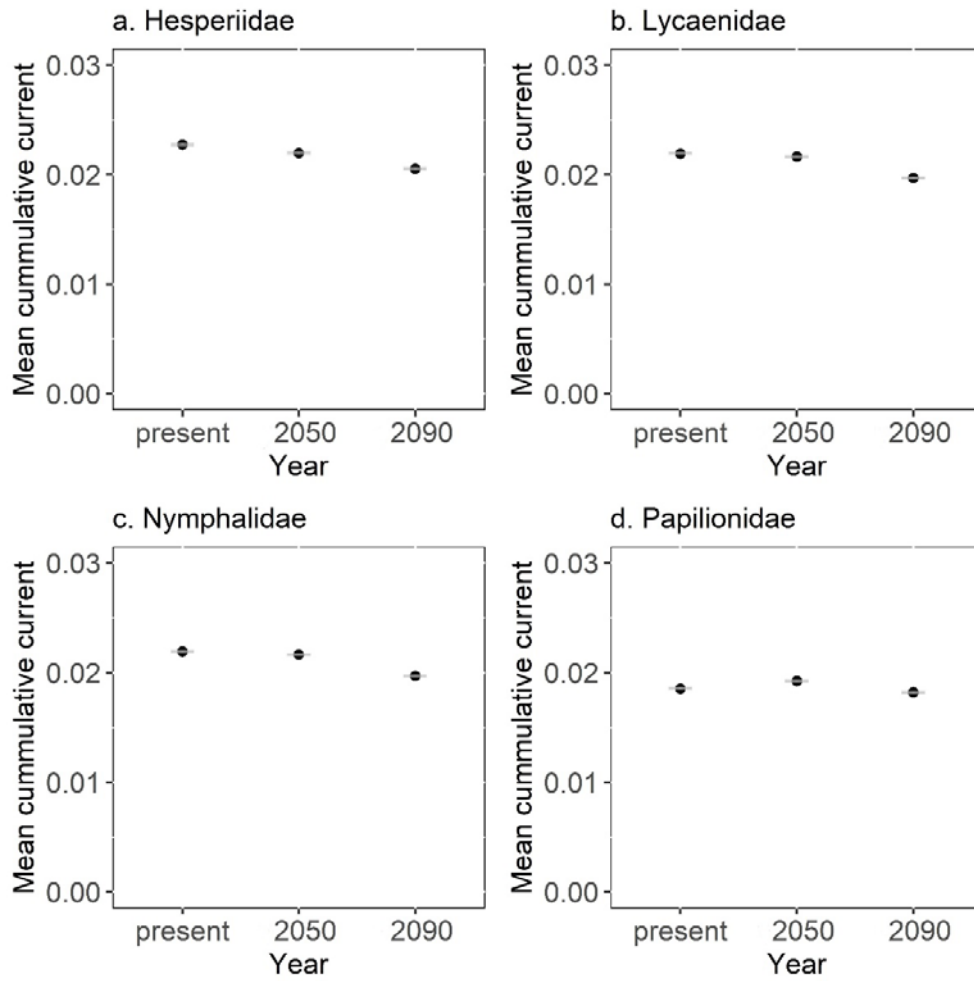

203

204 **Fig 1.** Mean cumulative current with standard error of the families (a) HesperIIDae (b)

205 LycaenIDae, (c) NymphalIDae, and (d) PapilionIDae under present conditions and future

206 scenarios of climate change (for the year 2050 and 2090).

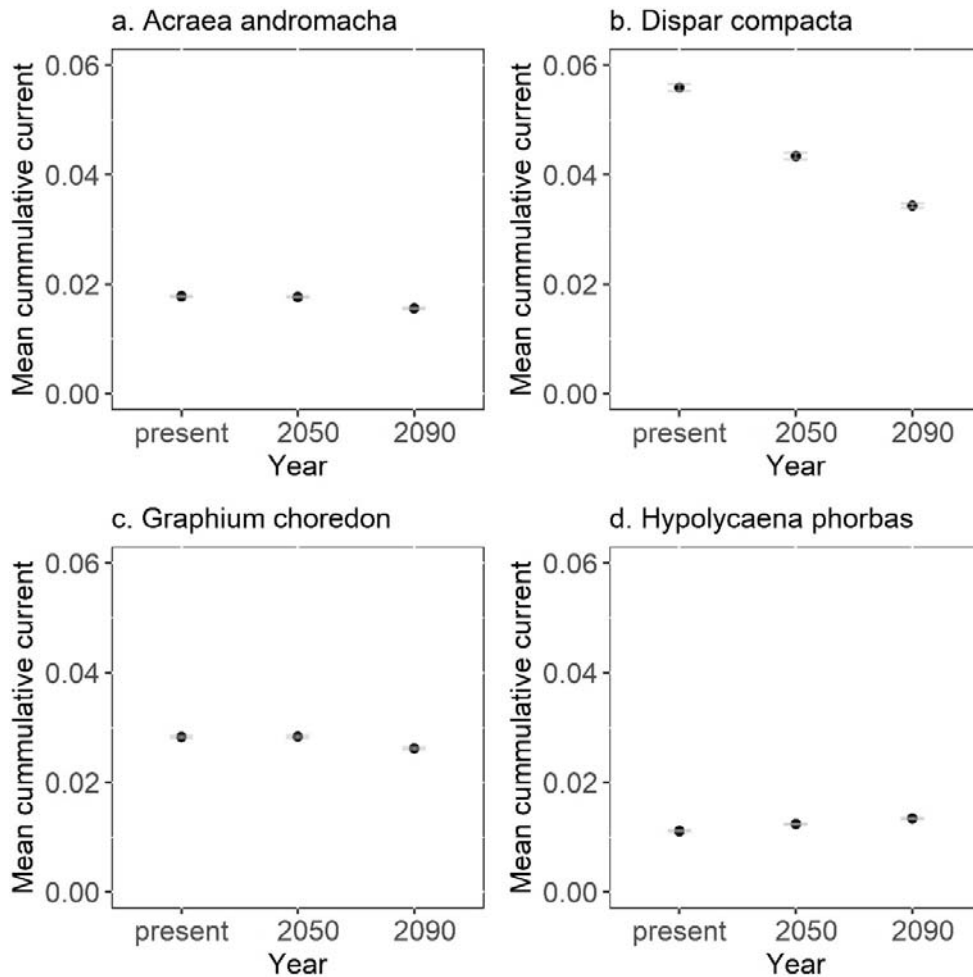

207

208 **Fig 2.** Mean cumulative current with standard error of the species (a) *Acraea andromacha* (b)  
209 *Dispar compacta*, (c) *Graphium choredon*, and (d) *Hypolycaena phorbis* under present  
210 conditions and future scenarios (the year 2050 and 2090).

211

212 Under present conditions, functional connectivity is modelled to vary between species and  
213 regionally, including those with similar geographical ranges. For example, *Catochrysops*  
214 *panormus* has higher connectivity along the northern part of Australia than *Graphium*  
215 *eury pylus*, *Papilio fuscus*, and *Ypthima arctous* (Fig. 3), while *Graphium eury pylus* and  
216 *Ypthima arctous* have higher connectivity along the eastern coast than the other species (Fig  
217 3), although those species are found across a similar geographic range.

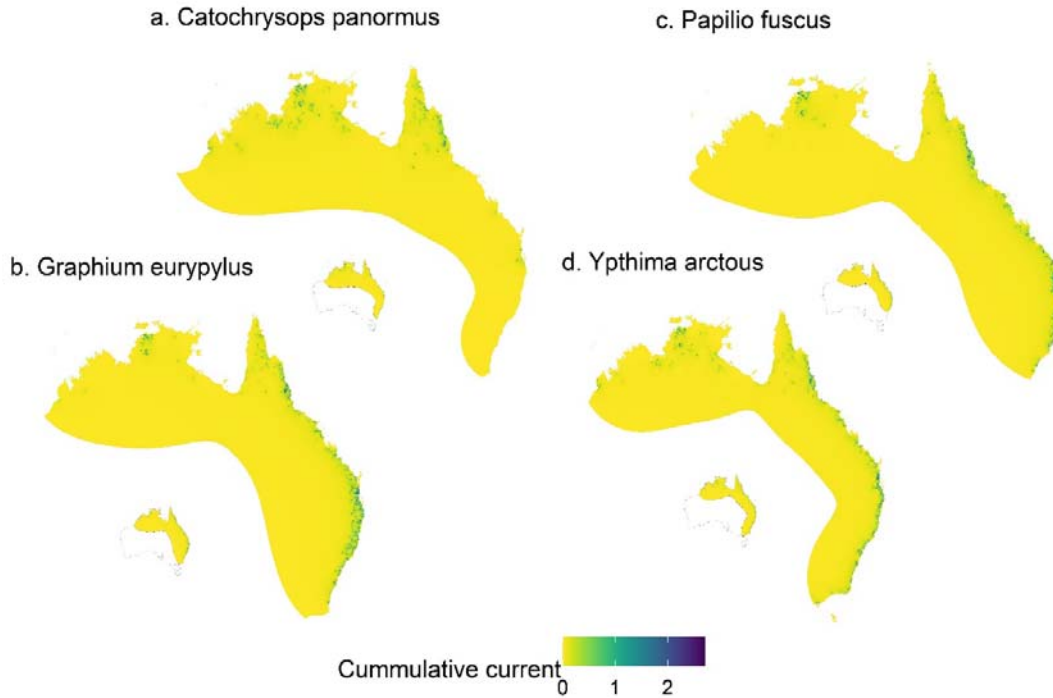

218

219 **Fig 3.** Functional connectivity of the species (a) *Catochrysops panormus* (b) *Graphium*  
220 *eurypylus*, (c) *Papilio fuscus*, and (d) *Ypthima arctous* under present-day conditions.

221

222 Most species (43 out of 59) showed consistent, ongoing declines in functional connectivity  
223 between the present and 2090 (Fig. 4). For *Arhopala eupolis*, *Candalides erinus*, *Cephrenes*  
224 *augiades*, *Jamides phaseli*, *Nacaduba biocellata*, *Oreixenica ptunarra*, *Papilio fuscus*,  
225 *Trapezites symmomus*, and *Vanessa kershawi* (9 out of the 59 species) the percentage of  
226 change between future scenarios 2050 and 2090 are similar (Fig 4). While for *Charaxes*  
227 *sempronius*, *Cressida cressida*, *Famegana alsulus*, *Hypolycaena phorbis*, *Junonia hedonia*,  
228 *Pelopidas lyelli*, and *Zizeeria karsandra* (7 out of the 59 species) the percentage of positive  
229 changes is higher in the year 2090 than in 2050 (Fig 4).

230

231 Although the percentage of change between future scenarios 2050 and 2090 are similar, for  
the *Oreixenica ptunarra* (Fig. 4) functional connectivity is still predicted to decrease,

232 particularly along the north-west and eastern parts of its range (Fig. 5a-c). And while the  
 233 percentage of positive changes is higher in the year 2090 than 2050 for *Pelopidas lyelli* and  
 234 *Famegana alsulus* (Fig 4) functional connectivity is predicted to increase along the southern  
 235 part of the range for *Pelopidas lyelli* (Fig. 5d-f) and along the north-eastern part of the range  
 236 for *Famegana alsulus* (Fig. 5g-i)

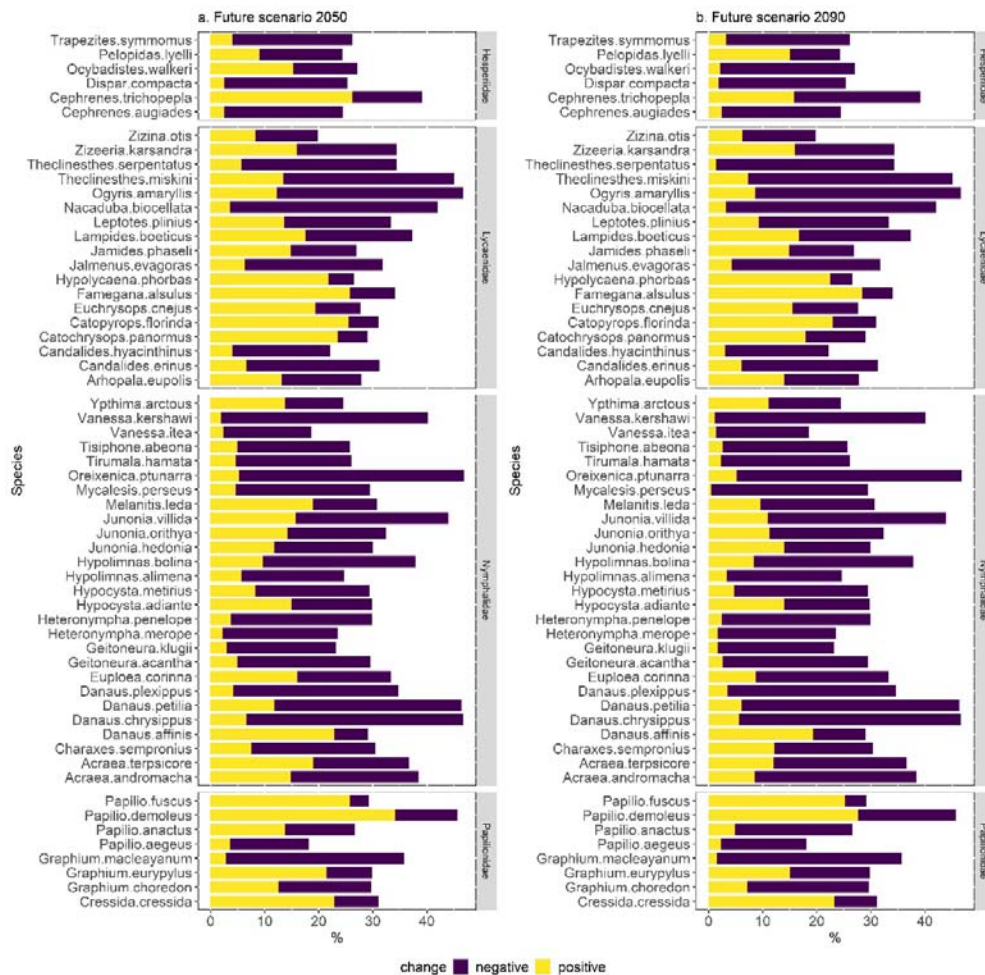

237

238 **Fig 4.** Percentage of negative and positive changes in functional connectivity for each  
 239 Australian butterfly species, grouped by family, under future scenarios (a) 2050 and (b) 2090.

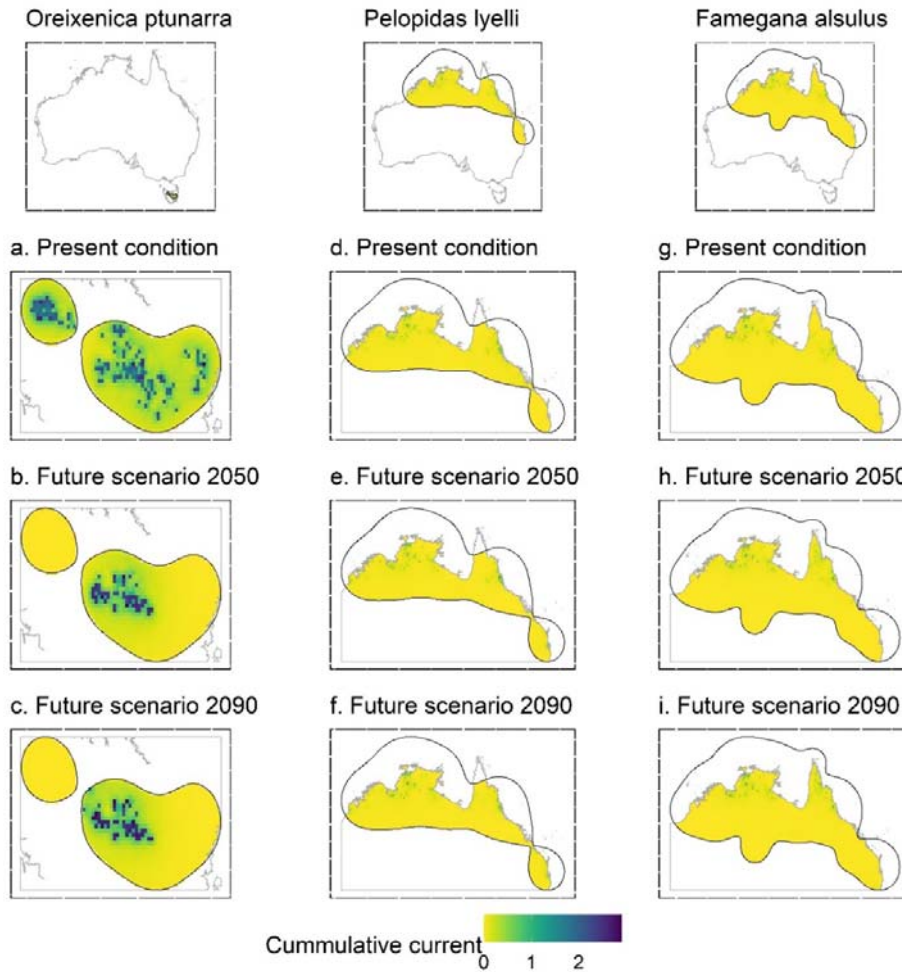

240

241 **Fig 5.** Functional connectivity of the species (a-c) *Oreixenica ptunarra*, (d-f) *Pelopidas lyelli*,  
242 and (g-i) *Famegana alsulus* under present conditions and future scenarios (for 2050 and  
243 2090).

244

245 Changes in functional connectivity were predicted to occur both along the periphery of a  
246 species' geographical range and within the core. For example, functional connectivity was  
247 predicted to be lost along the north-east range for *Geitoneura klugii* and *Heteronympha*  
248 *Penelope* (Fig. 6) as well as within the core of their ranges. In some cases, functional  
249 connectivity is also predicted to increase along the edges, for example, there is an increase  
250 along the south-west of the island of Tasmania for the *Geitoneura klugii* (Fig. 6a, b).



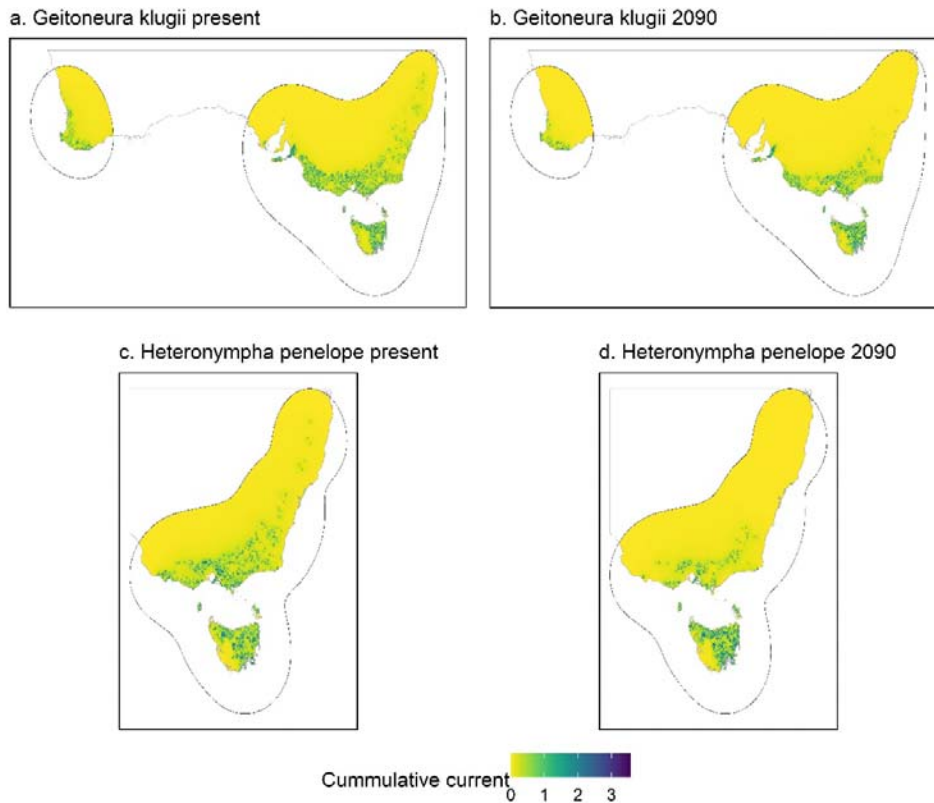

251

252 **Fig 6.** Functional connectivity of *Geitoneura klugii* (a-b) and *Heteronympha penelope* (c-d)  
253 under present conditions and future scenarios.

254

#### 255 **4. Discussion**

256 Butterflies are an ecologically important and conspicuous pollinating taxon that is threatened  
257 by habitat loss/fragmentation and climate change (Miao et al. 2020; Warren et al. 2021).

258 These threats can be mitigated by conserving and promoting functional connectivity, making  
259 it crucial that ecologists seek to identify such areas. Overall, our analysis predicts that

260 functional connectivity will show an overall decrease, with most butterfly species

261 experiencing a higher percentage of negative changes than positive; a trend that worsens over

262 time. Below we highlight how modelling can assist in the decision making of where

263 ecological corridors and stepping-stone habitats should be prioritised.

264 Under present conditions, the mean cumulative current is overall predicted to be higher along  
265 areas with core habitats or focal nodes (i.e., areas with high habitat suitability); a finding  
266 common to studies of other taxa such as African elephants (Roever et al. 2013), birds  
267 (Grafius et al. 2017), and ungulates (Malakoutikhah et al. 2020). The differences and  
268 similarities in functional connectivity between butterfly species with similar (estimated)  
269 ranges can be attributed, in large part, to their habitat preferences. For example, *C. panormus*  
270 (functional connectivity predicted to decrease; Fig 4) occur in open eucalyptus forest and  
271 savannah woodland, whereas *G. eurypylus* (functional connectivity predicted to decrease; Fig  
272 4) occur in monsoon forest, rainforest, and even urban gardens (Braby 2000). As another  
273 relevant contrast of species with similar-sized geographic ranges but different responses are,  
274 *P. fuscus*, (functional connectivity predicted to remain similar between 2050 and 2090; Fig 4)  
275 being found in coastal and subcoastal lowlands rainforest and monsoon forest, compared to *Y.*  
276 *arctous* (functional connectivity predicted to decrease; Fig 4), which prefers coastal and  
277 subcoastal woodlands and open forest (Braby 2000).

278 Overall, we predicted the functional connectivity of most butterfly species in Australia to  
279 decrease over the coming decades, albeit with a few exceptions. Our predictions are similar to  
280 studies that predicted several non-butterfly taxa such as the Sichuan snub-nosed monkey  
281 (Zhang et al. 2019b), ungulates (Malakoutikhah et al. 2020; Liang et al. 2021), and the  
282 Himalayan brown bear (Mukherjee et al. 2021) to experience a future decrease in functional  
283 connectivity due to climate change in different parts of the world. To our knowledge, this is  
284 the first attempt to predict the combined impacts of land-use, land-cover, and climate change  
285 on the functional connectivity of butterflies.

286 The mean cumulative circuit-theory ‘current’ is overall predicted to be highest along areas  
287 with the best habitat suitability for a given species. The predicted decrease in functional  
288 connectivity for most species is expected because climate change is predicted to change the

289 geographic distributions of butterflies (Adhikari et al. 2020; Minachilis et al. 2021). Overall,  
290 most of the changes are predicted along the edges of a species range, because populations  
291 along boundaries are generally inhabiting the limits of their physiological tolerances  
292 compared to those at the core, leaving them more vulnerable to climate change (Parmesan et  
293 al. 2000). These changes could also be due to land-use and land-cover change which is  
294 observed (Zhang et al. 2019a; Wang et al. 2020) and predicted (Li et al. 2017) to result in loss  
295 of forest areas which could have negative impacts on species depending on such habitats.  
296 Overall land-use and land-cover change have a negative impact on biodiversity in Australia  
297 including on butterflies (Thackway 2018; Davidson et al. 2021; Kutt et al. 2021).

298 Given the continental scale of the study area and the number of species assessed, there were a  
299 few limitations to the study. Spatial scale can influence functional connectivity models  
300 (Laliberté and St-Laurent 2020) and while 1-km spatial resolution predictors are available,  
301 the extent of the study area and the high computational requirements forced us to use a  
302 coarser resolution of 5 km. The accuracy of the habitat suitability models can be influenced  
303 by several factors, including the temporal equilibrium (or lack thereof) between data points  
304 (species observations) and the geophysical and landscape predictors, as well as the interaction  
305 between the spatial scale of the predictors and attributes of the species (Dormann 2007).

306 Validating functional connectivity models is a challenging process (Laliberté and St-Laurent  
307 2020), with suggested methods including field observations by scientists or automated field  
308 recorders (e.g., camera traps, acoustic recorders), along with accurate GPS data (Grafius et al.  
309 2017; Finch et al. 2020; Laliberté and St-Laurent 2020). However, in this study, we used  
310 citizen science data to build and validate the models, because of the scale of the study area  
311 and the number of species studied, which has the advantage of volume, but the constraint of a  
312 lower-level of precision and quality control.

313

314 **5. Conclusion**

315 Butterflies are an important pollinating group, but the functional connectivity for several  
316 species are predicted to decrease across Australia in the coming decade due to the combined  
317 impacts of land-use, land-cover and climate change. Conservation efforts are being made to  
318 improve ecological corridors and stepping-stone habitat-restoration programs to promote  
319 functional connectivity, in some cases these efforts include invertebrates such as bees (e.g.,  
320 Miranda et al. 2021) in other cases the focus is only on vertebrate taxa (e.g., Jones et al.  
321 2021). We advocate conservation efforts should include butterflies and other pollinating taxa  
322 as well. The availability of our results as a spatial dataset, along with analogous findings from  
323 other taxa, will assist in identifying priority conservation areas. Future studies on butterflies  
324 should consider (1) collecting dispersal data, to build better connectivity models given that  
325 radio telemetry for butterflies is now becoming a logistically viable option (Wang et al.  
326 2019), (2) improving the resistance layer by including spatial data that contains food plants  
327 that caterpillars feed upon and butterflies pollinate (Kass et al. 2020), and (3) focussing on  
328 species most threatened (Geyle et al. 2021), to develop more targeted, species-specific  
329 conservation efforts.

330

331 **References**

332 Adhikari P, Jeon J-Y, Kim HW, Oh H-S, Adhikari P, Seo C (2020) Northward Range  
333 Expansion of Southern Butterflies According to Climate Change in South Korea. Journal of  
334 Climate 11(6-1):643-656 <http://dx.doi.org/10.15531/KSCCR.2020.11.6.643>

- 335 Aiello-Lammens ME, Boria RA, Radosavljevic A, Vilela B, Anderson RP (2015) spThin: an  
336 R package for spatial thinning of species occurrence records for use in ecological niche  
337 models. *Ecography* 38(5):541-545 <https://doi.org/10.1111/ecog.01132>
- 338 Allouche O, Tsoar A, Kadmon R (2006) Assessing the accuracy of species distribution  
339 models: prevalence, kappa and the true skill statistic (TSS). *Journal of Applied Ecology*  
340 43(6):1223-1232 <https://doi.org/10.1111/j.1365-2664.2006.01214.x>
- 341 Amin RJ, Buettel JC, Fielding MW, Vaughan PM, Brook BW (2021) Hot, unpredictable  
342 weather interacts with land use to restrict the distribution of the Yellow-tailed Black-  
343 Cockatoo. *Emu - Austral Ornithology*:1-10 <https://doi.org/10.1080/01584197.2021.1952083>
- 344 Anantharaman R, Hall K, Shah V, Edelman A (2020) Circuitscape in Julia: High  
345 Performance Connectivity Modelling to Support Conservation Decisions. *Proceedings of the*  
346 *JuliaCon Conferences* 1:1 <https://doi.org/10.21105/jcon.00058>
- 347 Ashrafzadeh MR, Naghipour AA, Haidarian M, Kusza S, Pilliod DS (2019) Effects of  
348 climate change on habitat and connectivity for populations of a vulnerable, endemic  
349 salamander in Iran. *Global Ecology and Conservation* 19:e00637  
350 <https://doi.org/10.1016/j.gecco.2019.e00637>
- 351 Bonnin N, Stewart FA, Wich SA, Pintea L, Jantz SM, Dickson R, Bellis J, Chitayat A,  
352 Ingram R, Moore RJ (2020) Modelling landscape connectivity change for chimpanzee  
353 conservation in Tanzania. *Biological Conservation* 252:108816  
354 <https://doi.org/10.1016/j.biocon.2020.108816>
- 355 Braby MF (2000) *Butterflies of Australia: their identification, biology and distribution*.  
356 CSIRO publishing

- 357 Breiman L (2001) Random forests. *Machine learning* 45(1):5-32  
358 <https://doi.org/10.1023/A:1010933404324>
- 359 Briscoe NJ, Kearney MR, Taylor CA, Wintle BA (2016) Unpacking the mechanisms  
360 captured by a correlative species distribution model to improve predictions of climate refugia.  
361 *Global Change Biology* 22(7):2425-2439 <https://doi.org/10.1111/gcb.13280>
- 362 Calenge C (2006) The package “adehabitat” for the R software: a tool for the analysis of  
363 space and habitat use by animals. *Ecological Modelling* 197(3-4):516-519  
364 <https://doi.org/10.1016/j.ecolmodel.2006.03.017>
- 365 Chen N (2017) Assessing Landscape Effects on Genetics and Dispersal of the Rocky  
366 Mountain Apollo Butterfly *Parnassius smintheus* using a Resistance Mapping Approach. The  
367 University of Western Ontario <https://ir.lib.uwo.ca/etd/5058>
- 368 Cheng W, Bonebrake TC (2017) Conservation effectiveness of protected areas for Hong  
369 Kong butterflies declines under climate change. *Journal of Insect Conservation* 21(4):599-  
370 606 <https://doi.org/10.1007/s10841-017-9998-7>
- 371 Chowdhury S, Alam S, Chowdhury SU, Rokonuzzaman M, Shahriar SA, Shome AR, Fuller  
372 RA (2021a) Butterflies are weakly protected in a mega-populated country, Bangladesh.  
373 *Global Ecology and Conservation* 26:e01484 <https://doi.org/10.1016/j.gecco.2021.e01484>
- 374 Chowdhury S, Fuller RA, Dingle H, Chapman JW, Zalucki MP (2021b) Migration in  
375 butterflies: a global overview. *Biological Reviews* <https://doi.org/10.1111/brv.12714>
- 376 Convention on Biological Diversity (2022) Aichi Biodiversity Target. Accessed 04 February  
377 2022 <https://www.cbd.int/aichi-targets/>

- 378 Correa Ayram CA, Mendoza ME, Etter A, Salicrup DRP (2016) Habitat connectivity in  
379 biodiversity conservation: A review of recent studies and applications. Progress in Physical  
380 Geography 40(1):7-37 <https://doi.org/10.1177/0309133315598713>
- 381 Costanza JK, Terando AJ (2019) Landscape connectivity planning for adaptation to future  
382 climate and land-use change. Current Landscape Ecology Reports 4(1):1-13  
383 <https://doi.org/10.1007/s40823-019-0035-2>
- 384 Cover TM, Hart PE (1967) Nearest Neighbor Pattern Classification. IEEE Transactions on  
385 Information Theory 13(1):21-27 <https://doi.org/10.1109/Tit.1967.1053964>
- 386 Davidson NJ, Bailey TG, Burgess S (2021) Restoring the Midlands of Tasmania: an  
387 introduction. Ecological Management & Restoration 22:3-10  
388 <https://doi.org/10.1111/emr.12522>
- 389 Dickson BG, Albano CM, Anantharaman R, Beier P, Fargione J, Graves TA, Gray ME, Hall  
390 KR, Lawler JJ, Leonard PB (2019) Circuit theory applications to connectivity science and  
391 conservation. Conservation Biology 33(2):239-249 <https://doi.org/10.1111/cobi.13230>
- 392 Dormann CF (2007) Promising the future? Global change projections of species distributions.  
393 Basic and Applied Ecology 8(5):387-397 <https://doi.org/10.1016/j.baae.2006.11.001>
- 394 Dormann CF, Calabrese JM, Guillera Arroita G, Matechou E, Bahn V, Bartoń K, Beale CM,  
395 Ciuti S, Elith J, Gerstner K (2018) Model averaging in ecology: a review of Bayesian,  
396 information theoretic, and tactical approaches for predictive inference. Ecological  
397 Monographs 88(4):485-504 <https://doi.org/10.1002/ecm.1309>
- 398 Dormann CF, Elith J, Bacher S, Buchmann C, Carl G, Carré G, Marquéz JRG, Gruber B,  
399 Lafourcade B, Leitao PJ (2013) Collinearity: a review of methods to deal with it and a

- 400 simulation study evaluating their performance. *Ecography* 36(1):27-46  
401 <https://doi.org/10.1111/j.1600-0587.2012.07348.x>
- 402 Fick SE, Hijmans RJ (2017) WorldClim 2: new 1 km spatial resolution climate surfaces for  
403 global land areas. *International Journal of Climatology* 37(12):4302-4315  
404 <https://doi.org/10.1002/joc.5086>
- 405 Filz KJ, Engler JO, Stoffels J, Weitzel M, Schmitt T (2013) Missing the target? A critical  
406 view on butterfly conservation efforts on calcareous grasslands in south-western Germany.  
407 *Biodiversity and Conservation* 22(10):2223-2241 <https://doi.org/10.1007/s10531-012-0413-0>
- 408 Finch D, Corbacho DP, Schofield H, Davison S, Wright PG, Broughton RK, Mathews F  
409 (2020) Modelling the functional connectivity of landscapes for greater horseshoe bats  
410 *Rhinolophus ferrumequinum* at a local scale. *Landscape Ecology* 35(3):577-589  
411 <https://doi.org/10.1007/s10980-019-00953-1>
- 412 Geyle HM, Braby MF, Andren M, Beaver EP, Bell P, Byrne C, Castles M, Douglas F, Glatz  
413 RV, Haywood B (2021) Butterflies on the brink: identifying the Australian butterflies  
414 (Lepidoptera) most at risk of extinction. *Austral Entomology*  
415 <https://doi.org/10.1111/aen.12525>
- 416 Grafius DR, Corstanje R, Siriwardena GM, Plummer KE, Harris JA (2017) A bird's eye  
417 view: using circuit theory to study urban landscape connectivity for birds. *Landscape*  
418 *Ecology* 32(9):1771-1787 <https://doi.org/10.1007/s10980-017-0548-1>
- 419 Hastie T, Tibshirani R, Buja A (1994) Flexible discriminant analysis by optimal scoring.  
420 *Journal of the American Statistical Association* 89(428):1255-1270  
421 <https://doi.org/10.1080/01621459.1994.10476866>



- 422 Hijmans RJ (2020) raster: Geographic Data Analysis and Modeling. 3.4-5
- 423 IPCC (2021) Climate Change 2021: The Physical Science Basis. Contribution of Working  
424 Group I to the Sixth Assessment Report of the Intergovernmental Panel on Climate Change  
425 Masson-Delmotte V., P. Zhai, A. Pirani, S.L. Connors, C. Péan, S. Berger, N. Caud, Y. Chen,  
426 L. Goldfarb, M.I. Gomis, M. Huang, K. Leitzell, E. Lonnoy, J.B.R. Matthews, T.K.  
427 Maycock, T. Waterfield, O. Yelekçi, R. Yu, and B. Zhou. Cambridge University Press. In  
428 Press.
- 429 Jackson CR, Marnewick K, Lindsey PA, Røskaft E, Robertson MP (2016) Evaluating habitat  
430 connectivity methodologies: a case study with endangered African wild dogs in South Africa.  
431 Landscape Ecology 31(7):1433-1447 <https://doi.org/10.1007/s10980-016-0342-5>
- 432 Jones ME, Bain GC, Hamer RP, Proft KM, Gardiner RZ, Dixon KJ, Kittipalawattanapol K,  
433 Zepeda de Alba AL, Ranyard CE, Munks SA (2021) Research supporting restoration aiming  
434 to make a fragmented landscape ‘functional’ for native wildlife. Ecological Management &  
435 Restoration 22:65-74 <https://doi.org/10.1111/emr.12504>
- 436 Kass JM, Anderson RP, Espinosa □ Lucas A, Juárez □ Jaimes V, Martínez □ Salas E, Botello F,  
437 Tavera G, Flores □ Martínez JJ, Sánchez □ Cordero V (2020) Biotic predictors with  
438 phenological information improve range estimates for migrating monarch butterflies in  
439 Mexico. Ecography 43(3):341-352 <https://doi.org/10.1111/ecog.04886>
- 440 Kirk H, Threlfall C, Soanes K, Ramalho C, Parris K, Amati M, Bekessy S, Mata L (2018)  
441 Improving connectivity for biodiversity across the City of Melbourne: A framework for  
442 evaluating and planning management actions. Report prepared for the City of Melbourne  
443 Urban Sustainability Branch.
- 444 Kuhn M (2021) caret: Classification and Regression Training. 6.0-86

- 445 Kutt AS, Dickson CR, Quarmby J, Kingdom D, Hamer RP (2021) Evaluating predictors of  
446 Ptunarra Brown Butterfly *Oreixenica ptunarra* abundance on a conservation reserve to refine  
447 future monitoring. *Ecological Management & Restoration* <https://doi.org/10.1111/emr.12544>
- 448 Laliberté J, St-Laurent M-H (2020) Validation of functional connectivity modeling: The  
449 Achilles' heel of landscape connectivity mapping. *Landscape and Urban Planning*  
450 202:103878 <https://doi.org/10.1016/j.landurbplan.2020.103878>
- 451 Li X, Chen G, Liu X, Liang X, Wang S, Chen Y, Pei F, Xu X (2017) A new global land-use  
452 and land-cover change product at a 1-km resolution for 2010 to 2100 based on human–  
453 environment interactions. *Annals of the American Association of Geographers* 107(5):1040-  
454 1059 <https://doi.org/10.1080/24694452.2017.1303357>
- 455 Liang J, Ding Z, Jiang Z, Yang X, Xiao R, Singh PB, Hu Y, Guo K, Zhang Z, Hu H (2021)  
456 Climate change, habitat connectivity, and conservation gaps: a case study of four ungulate  
457 species endemic to the Tibetan Plateau. *Landscape Ecology* 36(4):1071-1087  
458 <https://doi.org/10.1007/s10980-021-01202-0>
- 459 Littlefield CE, Krosby M, Michalak JL, Lawler JJ (2019) Connectivity for species on the  
460 move: supporting climate-driven range shifts. *Frontiers in Ecology and the Environment*  
461 17(5):270-278 <https://doi.org/10.1002/fee.2043>
- 462 Malakoutikhah S, Fakheran S, Hemami MR, Tarkesh M, Senn J (2020) Assessing future  
463 distribution, suitability of corridors and efficiency of protected areas to conserve vulnerable  
464 ungulates under climate change. *Diversity and Distributions* 26(10):1383-1396  
465 <https://doi.org/10.1111/ddi.13117>

- 466 McRae BH, Dickson BG, Keitt TH, Shah VB (2008) Using circuit theory to model  
467 connectivity in ecology, evolution, and conservation. *Ecology* 89(10):2712-2724  
468 <https://doi.org/10.1890/07-1861.1>
- 469 Miao BG, Peng YQ, Yang DR, Kubota Y, Economo EP, Liu C (2020) Climate and land use  
470 interactively shape butterfly diversity in tropical rainforest and savanna ecosystems of  
471 southwestern China. *Insect science* 28(4):1109-1120 [https://doi.org/10.1111/1744-  
472 7917.12824](https://doi.org/10.1111/1744-7917.12824)
- 473 Minachilis K, Kougioumoutzis K, Petanidou T (2021) Climate change effects on multi-taxa  
474 pollinator diversity and distribution along the elevation gradient of Mount Olympus, Greece.  
475 *Ecological Indicators* 132:108335 <https://doi.org/10.1016/j.ecolind.2021.108335>
- 476 Miranda LdS, Awade M, Jaffé R, Costa WF, Trevelin LC, Borges RC, de Brito RM, Tambosi  
477 LR, Giannini TC (2021) Combining connectivity and species distribution modeling to define  
478 conservation and restoration priorities for multiple species: a case study in the Eastern  
479 Amazon. *Biological Conservation* 257:109148 <https://doi.org/10.1016/j.biocon.2021.109148>
- 480 Mitchell MG, Bennett EM, Gonzalez A (2013) Linking landscape connectivity and  
481 ecosystem service provision: current knowledge and research gaps. *Ecosystems* 16(5):894-  
482 908 <https://doi.org/10.1007/s10021-013-9647-2>
- 483 Morán Ordóñez A, Briscoe NJ, Wintle BA (2018) Modelling species responses to extreme  
484 weather provides new insights into constraints on range and likely climate change impacts for  
485 Australian mammals. *Ecography* 41(2):308-320 <https://doi.org/10.1111/ecog.02850>
- 486 Mukherjee T, Sharma LK, Kumar V, Sharief A, Dutta R, Kumar M, Joshi BD, Thakur M,  
487 Venkatraman C, Chandra K (2021) Adaptive spatial planning of protected area network for

- 488 conserving the Himalayan brown bear. *Science of the Total Environment* 754:142416  
489 <https://doi.org/10.1016/j.scitotenv.2020.142416>
- 490 Ofori BY, Stow AJ, Baumgartner JB, Beaumont LJ (2017) Combining dispersal, landscape  
491 connectivity and habitat suitability to assess climate-induced changes in the distribution of  
492 Cunningham's skink, *Egernia cunninghami*. *PLOS One* 12(9):e0184193  
493 <https://doi.org/10.1371/journal.pone.0184193>
- 494 Parmesan C, Root TL, Willig MR (2000) Impacts of extreme weather and climate on  
495 terrestrial biota. *Bulletin of the American Meteorological Society* 81(3):443-450  
496 [https://doi.org/10.1175/1520-0477\(2000\)081<0443:IOEWAC>2.3.CO;2](https://doi.org/10.1175/1520-0477(2000)081<0443:IOEWAC>2.3.CO;2)
- 497 Potts SG, Ngo HT, Biesmeijer JC, Breeze TD, Dicks LV, Garibaldi LA, Hill R, Settele J,  
498 Vanbergen A (2016) The assessment report of the Intergovernmental Science-Policy Platform  
499 on Biodiversity and Ecosystem Services on pollinators, pollination and food production.  
500 Bonn, Germany, Secretariat of the Intergovernmental Science-Policy Platform on  
501 Biodiversity and Ecosystem Services
- 502 Ren J, Lee SD, Chen X, Kao B, Cheng R, Cheung D Naive bayes classification of uncertain  
503 data. In: 2009 Ninth IEEE International Conference on Data Mining, 2009. IEEE, p. 944-949
- 504 Rodrigues RG, Srivathsa A, Vasudev D (2021) Dog in the matrix: Envisioning countrywide  
505 connectivity conservation for an endangered carnivore. *Journal of Applied Ecology*  
506 <https://doi.org/10.1111/1365-2664.14048>
- 507 Roever CL, Van Aarde RJ, Leggett K (2013) Functional connectivity within conservation  
508 networks: Delineating corridors for African elephants. *Biological Conservation* 157:128-135  
509 <https://doi.org/10.1016/j.biocon.2012.06.025>

510 Rudnick D, Ryan SJ, Beier P, Cushman SA, Dieffenbach F, Epps C, Gerber LR, Hartter JN,  
511 Jenness JS, Kintsch J (2012) The role of landscape connectivity in planning and  
512 implementing conservation and restoration priorities. *Issues in Ecology*. Report No. 16,  
513 Ecological Society of America. Washington, DC.

514 Samways MJ, Barton PS, Birkhofer K, Chichorro F, Deacon C, Fartmann T, Fukushima CS,  
515 Gaigher R, Habel JC, Hallmann CA (2020) Solutions for humanity on how to conserve  
516 insects. *Biological Conservation* 242:108427 <https://doi.org/10.1016/j.biocon.2020.108427>

517 Sands DP (2018) Important issues facing insect conservation in Australia: now and into the  
518 future. *Austral Entomology* 57(2):150-172 <https://doi.org/10.1111/aen.12342>

519 Sazli MH (2006) A brief review of feed-forward neural networks. *Communications Faculty*  
520 *of Sciences University of Ankara Series A2-A3 Physical Sciences and Engineering* 50(01)  
521 [https://doi.org/10.1501/commua1-2\\_0000000026](https://doi.org/10.1501/commua1-2_0000000026)

522 Stewart FE, Darlington S, Volpe JP, McAdie M, Fisher JT (2019) Corridors best facilitate  
523 functional connectivity across a protected area network. *Scientific Reports* 9(1):1-9  
524 <https://doi.org/10.1038/s41598-019-47067-x>

525 Thackway R (2018) *Land Use in Australia: Past, Present and Future*. ANU Press

526 Venter O, Sanderson EW, Magrach A, Allan JR, Beher J, Jones KR, Possingham HP,  
527 Laurance WF, Wood P, Fekete BM, Levy MA, Watson JE (2018) Last of the Wild Project,  
528 Version 3 (LWP-3): 2009 Human Footprint, 2018 Release <https://doi.org/10.7927/H46T0JQ4>

529 Wang SW, Gebru BM, Lamchin M, Kayastha RB, Lee W-K (2020) Land use and land cover  
530 change detection and prediction in the Kathmandu district of Nepal using remote sensing and  
531 GIS. *Sustainability* 12(9):3925 <https://doi.org/10.3390/su12093925>

532 Wang Z, Huang Y, Pierce NE (2019) Radio telemetry helps record the dispersal patterns of  
533 birdwing butterflies in mountainous habitats: Golden Birdwing (*Troides aeacus*) as an  
534 example. *Journal of Insect Conservation* 23(4):729-738 [https://doi.org/10.1007/s10841-019-](https://doi.org/10.1007/s10841-019-00167-5)  
535 [00167-5](https://doi.org/10.1007/s10841-019-00167-5)

536 Warren MS, Maes D, van Swaay CA, Goffart P, Van Dyck H, Bourn NA, Wynhoff I, Hoare  
537 D, Ellis S (2021) The decline of butterflies in Europe: Problems, significance, and possible  
538 solutions. *Proceedings of the National Academy of Sciences* 118(2)  
539 <https://doi.org/10.1073/pnas.2002551117>

540 Winfree R, Bartomeus I, Cariveau DP (2011) Native Pollinators in Anthropogenic Habitats.  
541 *Annual Review of Ecology, Evolution, and Systematics* 42:1-22  
542 <https://doi.org/10.1146/annurev-ecolsys-102710-145042>

543 Zhang C, Zhong S, Wang X, Shen L, Liu L, Liu Y (2019a) Land use change in coastal cities  
544 during the rapid urbanization period from 1990 to 2016: a case study in Ningbo City, China.  
545 *Sustainability* 11(7):2122 <https://doi.org/10.3390/su11072122>

546 Zhang Y, Clauzel C, Li J, Xue Y, Zhang Y, Wu G, Giraudoux P, Li L, Li D (2019b)  
547 Identifying refugia and corridors under climate change conditions for the Sichuan  
548 snub-nosed monkey (*Rhinopithecus roxellana*) in Hubei Province, China. *Ecology and*  
549 *evolution* 9(4):1680-1690 <https://doi.org/10.1002/ece3.4815>

550
